# Supplementary material for: MicroRNA-421 regulated by HIF-1α promotes metastasis, inhibits apoptosis, and induces cisplatin resistance by targeting E-cadherin and caspase-3 in gastric cancer
Source: PubMed Central journal article supplement (PMC5029715; doi:10.18632/oncotarget.8228), 2016-03-21
Supplement: oncotarget-07-24466-s001.pdf [file oncotarget-07-24466-s001.pdf]

SUPPLEMENTARY FIGURES AND TABLE

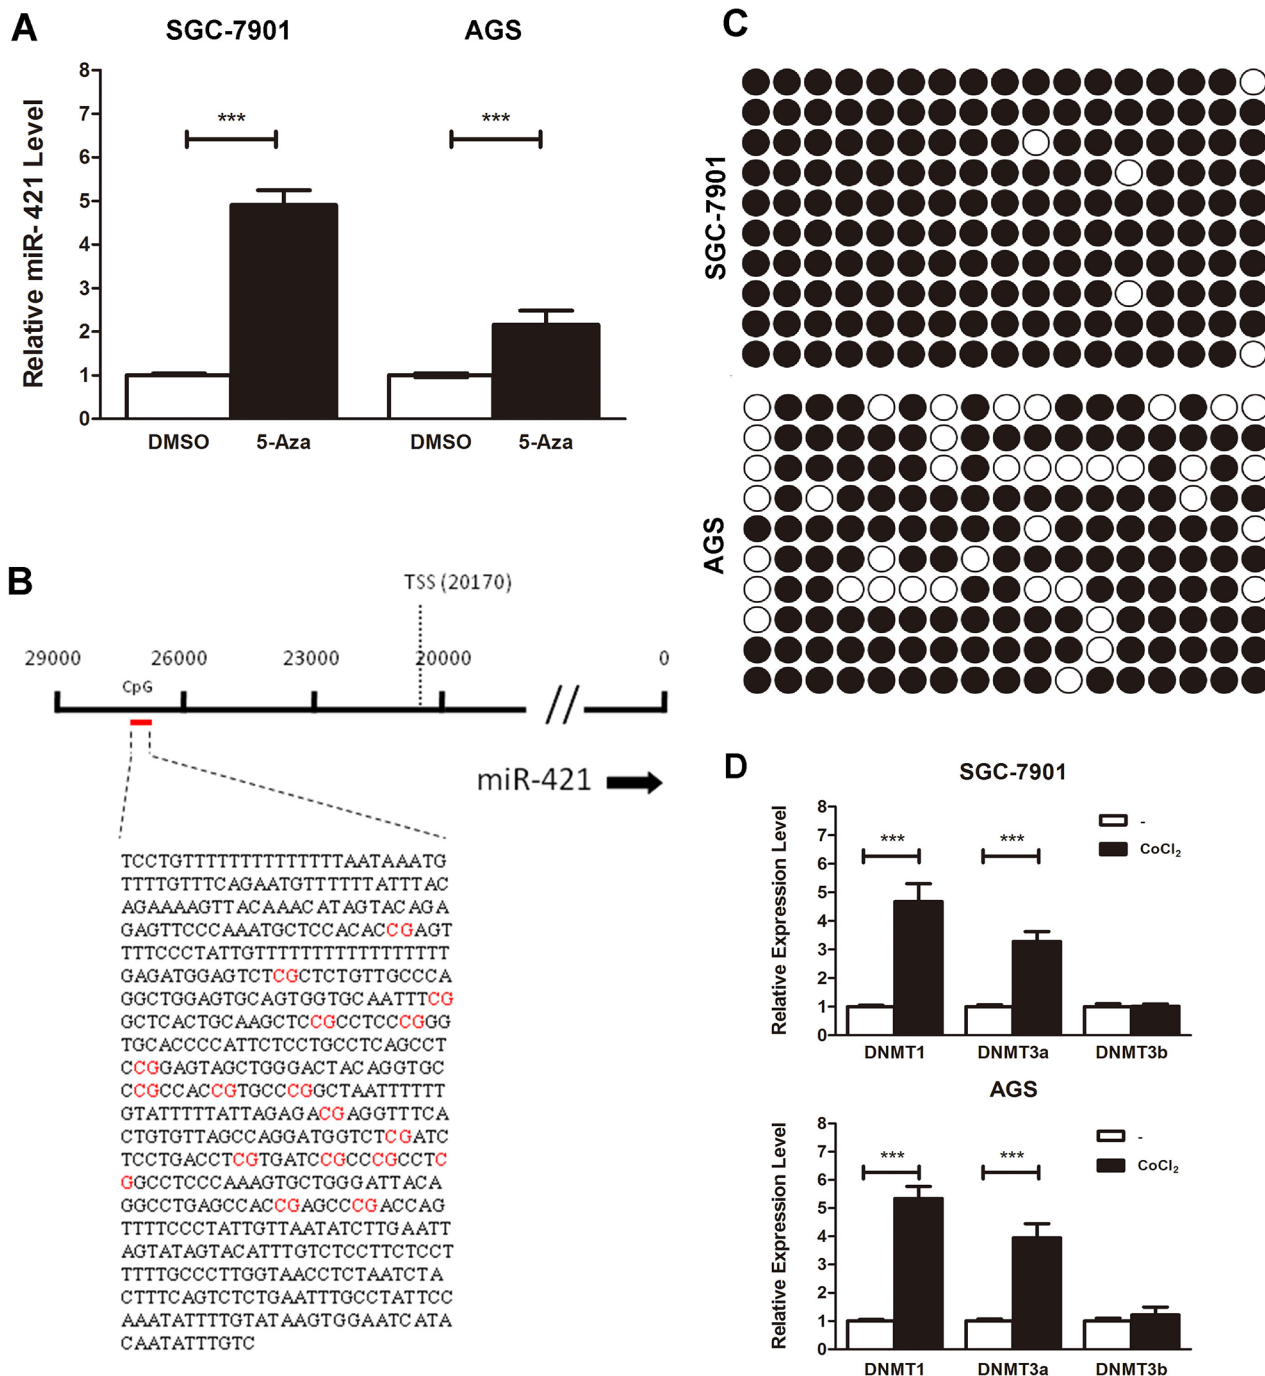

**Supplementary Figure S1: DNA methylation is involved in miR-421 regulation.** A. DNA methylation inhibitor 5-Aza increases the expression of miR-421 in SGC-7901 and AGS gastric cancer cell lines. B. Region of CpG Island of miR-421 was predicted by the CpG Island Searcher Program. C. The promoter of miR-421 is hypermethylated in gastric cancer cell lines SGC-7901 and AGS. The filled and open circles represent the methylated and unmethylated CpGs from ten independent randomly chosen colonies. D. Involvement of CoCl<sub>2</sub> increases the expression of DNMT1 and DNMT 3a in both cell lines (RNA level). Columns mean of three independent experiments, and bars SD. \*\*\**P* < 0.001.

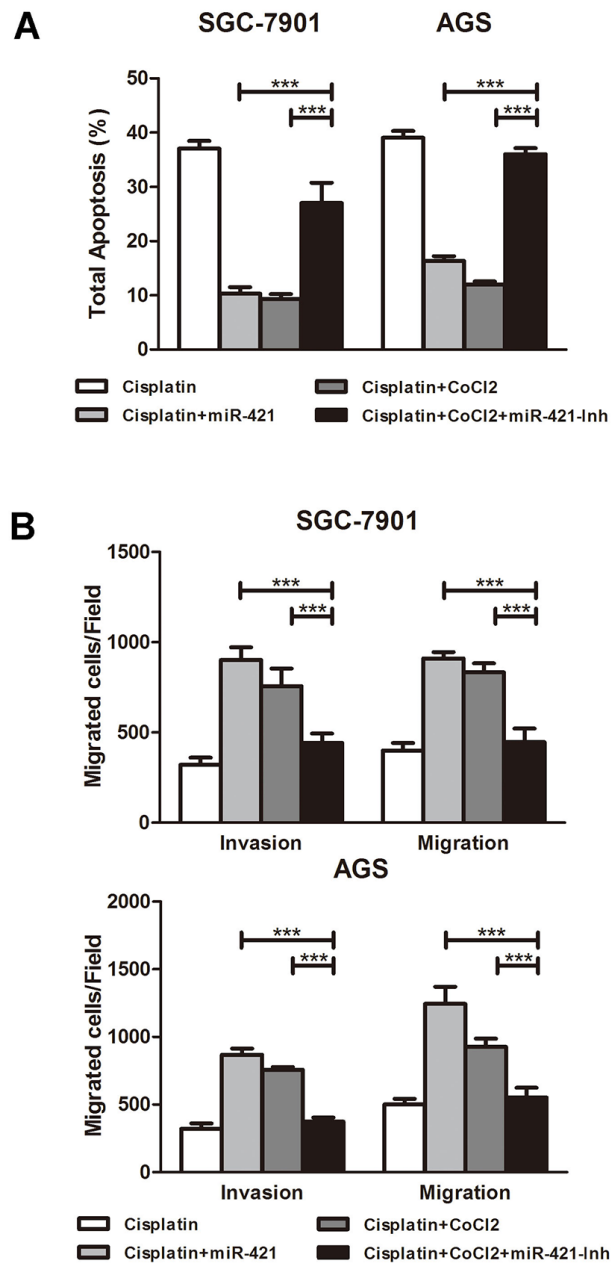

**Supplementary Figure S2: MiR-421-Inh reverses the function of HIF-1 $\alpha$ .** **A.** Flow cytometry analysis indicates that CoCl<sub>2</sub> or miR-421 drastically decreases the percentage of apoptotic cells in cisplatin treated SGC-7901 and AGS, and transfection of miR-421-Inh together with CoCl<sub>2</sub> functions inversely (histograms are presented). **B.** Transwell assays illustrate that CoCl<sub>2</sub> or miR-421 drastically increases the migration and invasion ability in cisplatin treated SGC-7901 and AGS, and transfection of miR-421-Inh together with CoCl<sub>2</sub> functions inversely (quantitative analysis is presented). Columns mean of three independent experiments, and bars SD. \*\*\* $P < 0.001$ .

Supplementary Table S1: The oligonucleotides used in this study

| Name <sup>a</sup>         | Sequence (5'→3')                                                     |
|---------------------------|----------------------------------------------------------------------|
| miR-421 mimics (sense)    | AUCAACAGACAUUAAUUGGGCGC                                              |
| miR-421-Inh (sense)       | GCGCCCAAUUAUGUCUGUUGAU                                               |
| antagomiR-421 (sense)     | GCGCCCAAUUAUGUCUGUUGAU                                               |
| NC (sense)                | ACUACUGAGUGACAGUAGA                                                  |
| NC-Inh (sense)            | UCUACUCUUUCUAGGAGGUUGUGA                                             |
| Si-HIF-1 $\alpha$ (sense) | UCAAGUUGCUGGUCAUCAG                                                  |
| Si-E-cadherin (sense)     | GCCACAUACACUCUCUUCUTT GAGGCUGUAUACACCAUAUTT<br>GGGACAACGUUUAUUACUATT |
| dsE-cadherin (sense)      | AACCGUGCAGGUCCCAUAATT                                                |
| miR-421 F                 | ATCAACAGACATTAATTGGGCGC                                              |
| miR-210 F                 | AGCCCCTGCCACCGCACACTG                                                |
| miR-424 F                 | CAAAACGTGAGGCGTGTCTAT                                                |
| miR-130b F                | ACTCTTCCCTGTTGCACTAC                                                 |
| miR-129-3p F              | AAGCCCTTACCCAAAAAAGTAT                                               |
| miR-382 F                 | GAAGTTGTTTCGTGGTGGATTTCG                                             |
| U6 F                      | TGCGGGTGCTCGCTTCGGCAGC                                               |
| DNMT 1 F                  | AGGTGGAGAGTTATGACGAGGC                                               |
| DNMT 1 R                  | GGTAGAATGCCTGATGGTCTGC                                               |
| DNMT 3a F                 | CCTCTTCGTTGGAGGAATGTGC                                               |
| DNMT 3a R                 | GTTTCCGCACATGAGCACCTCA                                               |
| DNMT 3b F                 | TAACAACGGCAAAGACCGAGGG                                               |
| DNMT 3b R                 | TCCTGCCACAAGACAAACAGCC                                               |
| miR-421 promoter F        | tcgaGCTAGCCACCACCCTCTGGCTAA                                          |
| miR-421 promoter R        | tcgaAAGCTTCAATCCTCCCTCCTCACC                                         |
| CpG F                     | TTTTAGAATGTTTTTTATTTATAGAAAAG                                        |
| CpG R                     | CAAAATATTAACAATAAAAAAACTAATC                                         |
| GAPDH F                   | AAGGTGAAGGTTCGGAGTCA                                                 |
| GAPDH R                   | GGAAGATGGTGATGGGATTT                                                 |
| E-cadherin-Wt F           | cACAATCAAAGAAAAGACTTTTGTGAAATAGCTTTACTGTTTCTCAAg                     |
| E-cadherin -Wt R          | tcgacTTGAGAAACAGTAAAGCTATTTCAACAAAAGTCTTTTCTTTGATTGTgagct            |
| E-cadherin -Mut F         | cACAATCAAAGAAAAGACTTTTacaacttATAGCTTTACTGTTTCTCAAg                   |
| E-cadherin -Mut R         | tcgacTTGAGAAACAGTAAAGCTATaagttgtAAAGTCTTTTCTTTGATTGTgagct            |
| Caspase-3-Wt F            | cATTCTTAAGTATGTTATTTTCTGTTGAAGTTTACAATCAAAGGAAAATg                   |
| Caspase-3-Wt R            | tcgacATTTTCCTTTGATTGTAAACTTCAACAGAAAATAACATACTTAAGAATgagct           |
| Caspase-3-Mut F           | cATTCTTAAGTATGTTATTTTgacaacttGTTTACAATCAAAGGAAAATg                   |
| Caspase-3-Mut R           | tcgacATTTTCCTTTGATTGTAAACaagttgtcAAAATAACATACTTAAGAATgagct           |

<sup>a</sup> F, forward primer; R, reverse primer.
